# Supplementary material for: S-1–Induced Lacrimal Drainage Obstruction and Its Association with Ingredients/Metabolites of S-1 in Tears and Plasma: A Prospective Multi-institutional Study
Source: PubMed Central journal article supplement — Cancer Res Treat. 2017 Feb 27;50(1):30–9. doi: 10.4143/crt.2016.569 (PMC5784617; doi:10.4143/crt.2016.569), 2017-02-27
Supplement: crt-2016-569-suppl1.pdf [file crt-2016-569-suppl1.pdf]

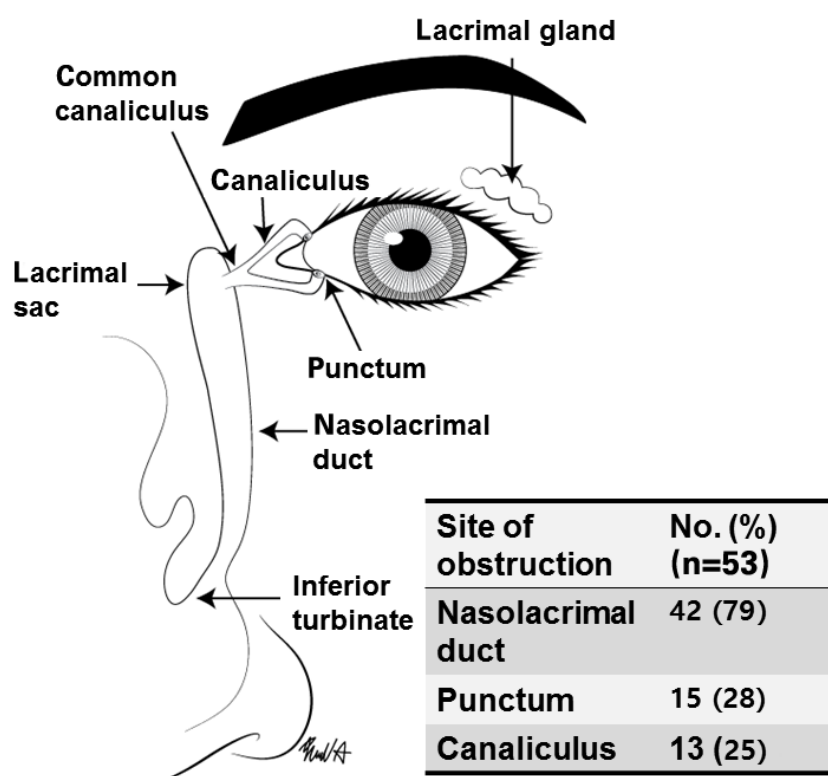

**S1 Fig.** Anatomic sites of obstruction of the lacrimal drainage apparatus. The most common site of obstruction was nasolacrimal duct (n=42), followed by punctum (n=15) and canaliculus (n=13); 15 patients had the obstruction at two or more levels simultaneously.
