# Supplementary material for: S-1–Induced Lacrimal Drainage Obstruction and Its Association with Ingredients/Metabolites of S-1 in Tears and Plasma: A Prospective Multi-institutional Study
Source: PubMed Central journal article supplement — Cancer Res Treat. 2017 Feb 27;50(1):30–9. doi: 10.4143/crt.2016.569 (PMC5784617; doi:10.4143/crt.2016.569), 2017-02-27
Supplement: crt-2016-569-suppl2.pdf [file crt-2016-569-suppl2.pdf]

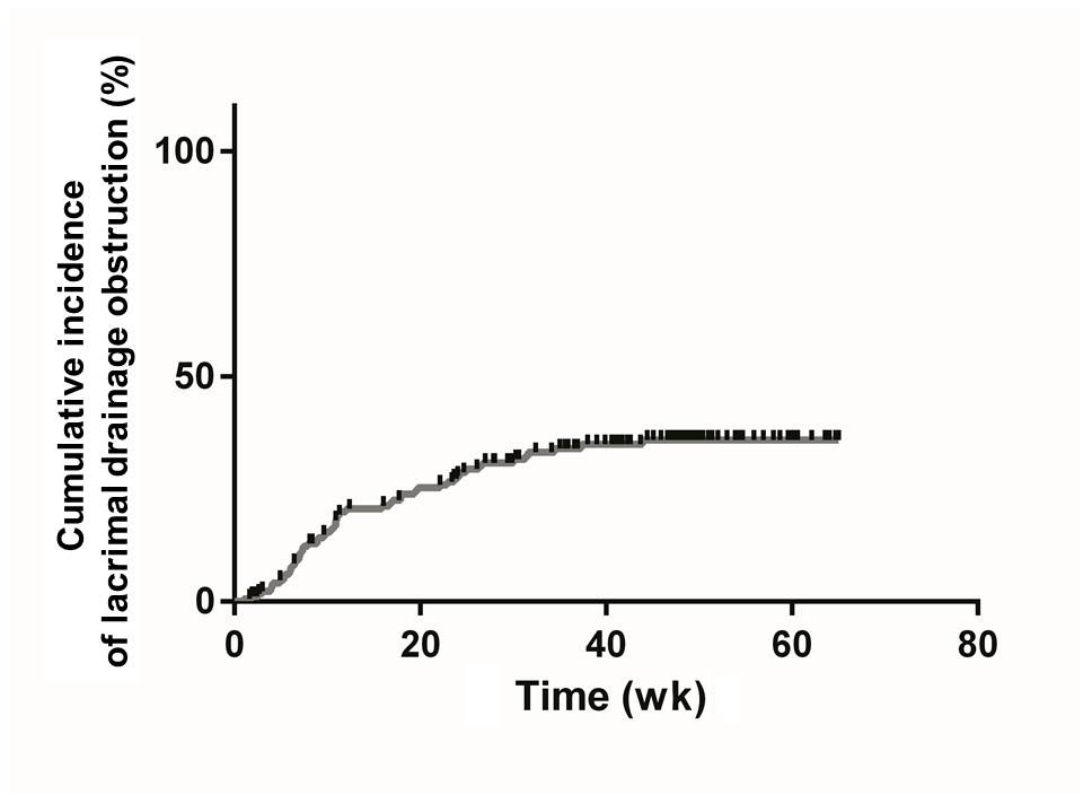

**S2 Fig.** The cumulative incidence of lacrimal drainage obstruction in all patients initially enrolled into this study (n=180). We conducted an additional analysis including all patients initially enrolled into this study (n=180). In this analysis, 35 patients whose ophthalmologic follow-up was less than 6 months were also included and censored on the last date of ophthalmologic follow-up. The cumulative incidences of lacrimal drainage obstruction were 21%, 29%, 35%, and 36% at 3, 6, 9, and 12 months after the initiation of S-1 chemotherapy, respectively
